# Supplementary material for: Synthesis of manganese-oxide and palladium nanoparticles co-decorated polypyrrole/graphene oxide (MnO2@Pd@PPy/GO) nanocomposites for anti-cancer treatment
Source: Royal Society of Chemistry journal article supplement (doi:10.1039/d2ra03860a), 2022-01-01
Supplement: d2ra03860a1.pdf [file d2ra03860a1.pdf]

**Synthesis of manganese-oxide and palladium nanoparticles co-decorated polypyrrole/graphene oxide (MnO<sub>2</sub>@Pd@PPy/GO) nanocomposites for anti-cancer**

Jiarui Wu <sup>a, b1</sup>, Meng Wang <sup>a1</sup>, Yuanjie Pan <sup>c</sup>, Yipeng Pang <sup>d</sup>, Yanyan Tang <sup>b</sup>, Chang Song <sup>c</sup>, Jiahui Zhu <sup>d</sup>, Xian Zhang <sup>b</sup> and Qingli Huang <sup>a, c\*</sup>

*<sup>a</sup> Public experimental research center of Xuzhou Medical University, Xuzhou city, Jiangsu 221004, China*

*<sup>b</sup> The first clinical medical college of Xuzhou Medical University, Xuzhou, Jiangsu 221004, China*

*<sup>c</sup> School of pharmacy of Xuzhou Medical University, Xuzhou city, Jiangsu 221004, China*

*<sup>d</sup> School of Life Science of Xuzhou Medical University, Xuzhou city, Jiangsu 221004, China*

*<sup>1</sup> These authors contributed equally to this work*

---

\* To whom correspondence should be addressed. Fax: ++86-516-83262091.

E-mail: qlhuang@xzhmu.edu.cn

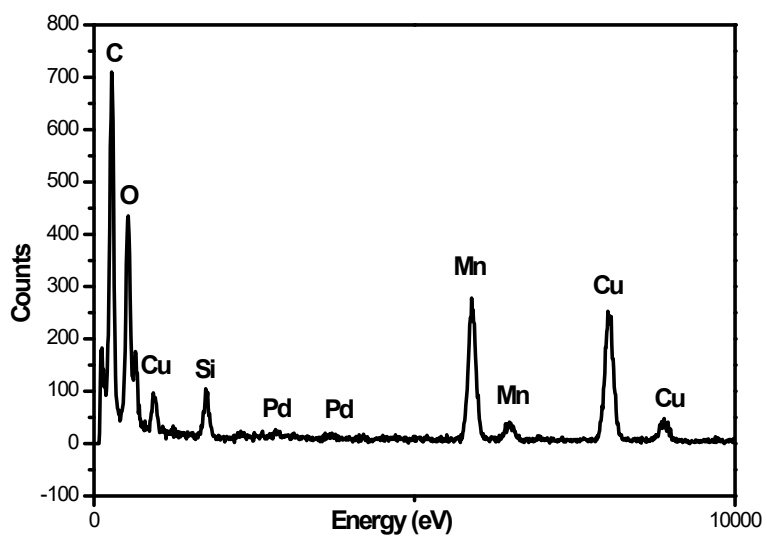

Fig.S1. EDS spectrum of GOPPMns.

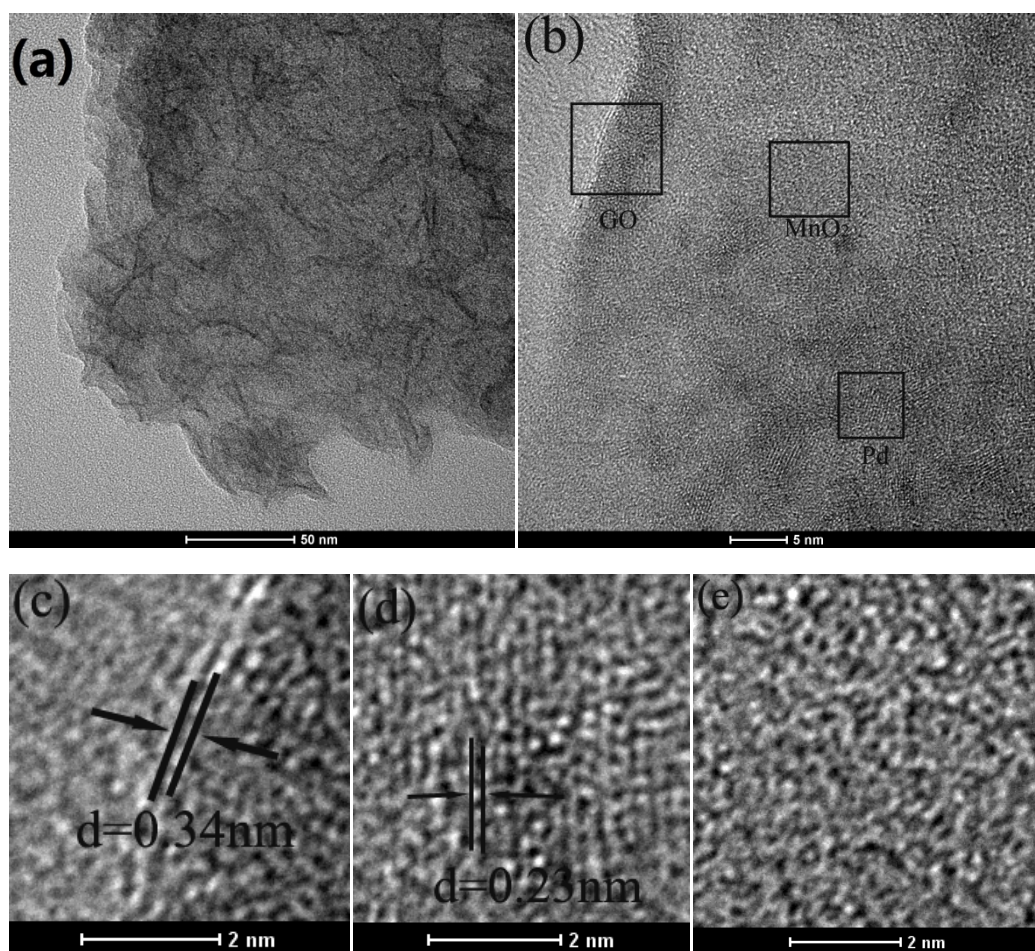

**Fig.S2.** (a, b) High magnification transmission electron microscope images of GOPPMs and interplanar distance of (c) GO, (d) Pd and (e) MnO<sub>2</sub>.

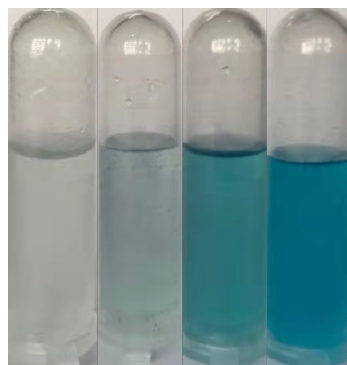

GO    GOPs    GOPPs    GOPPMns

**Fig.S3.** The images of enzyme-like catalytic reaction of the as-prepared nanocomposites (GO, GOPs, GOPPs and GOPPMns) on TMB after 30 min (nanocomposites,  $30 \mu\text{g}\cdot\text{mL}^{-1}$ ; TMB 1 mM;  $\text{H}_2\text{O}_2$ , 0.1mM; pH 5.0).

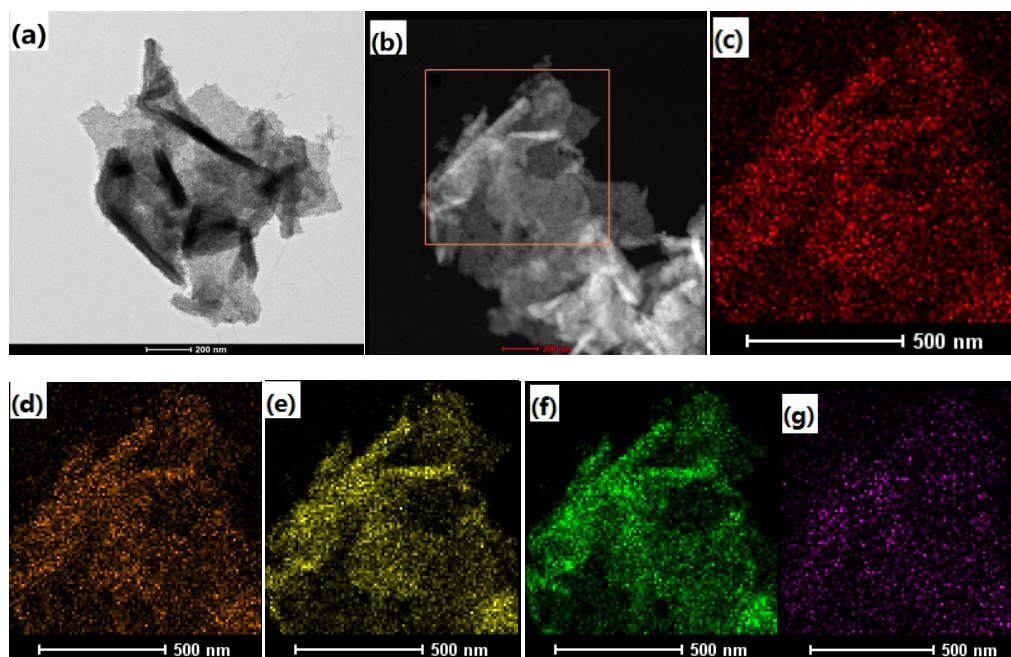

**Fig.S4.** TEM(a), HAADF images (b) and EDS mapping images (c-g) of GOPPMNs after six months of synthesis (carbon-red, oxygen-orange, nitrogen-yellow, manganese-green, and palladium-purple).
